# Supplementary material for: MicroRNA-934 is a novel primate-specific small non-coding RNA with neurogenic function during early development
Source: eLife. 2020 May 27;9:e50561. doi: 10.7554/eLife.50561 (PMC7295570; doi:10.7554/eLife.50561)
Supplement: Figure 1—source data 1. [file elife-50561-fig1-data1.xlsx]

## Sheet: Sheet1
FIGURE 1H
qRT PCR
	PAX6 Relatve Expression
experiments (n=3)	HUES	Embryoid Bodies	NPCs
1	0	0.881278	34.4318
2	0	0.983274	27.3159
3	0	1.15322	31.5085
Average		1.00592	31.0854
St Error		0.284272	10.9629
	DCX Relative Expression
experiments (n=3)	HUES	Embryoid Bodies	NPCs
1	0.306934	0.426909	5.78239
2	0.198609	0.402762	5.45533
3	0.390529	0.254101	3.89114
Average	0.298691	0.361257	5.04296
St Error	0.0555558	0.0540298	0.583595
