# Supplementary material for: MicroRNA-934 is a novel primate-specific small non-coding RNA with neurogenic function during early development
Source: eLife. 2020 May 27;9:e50561. doi: 10.7554/eLife.50561 (PMC7295570; doi:10.7554/eLife.50561)
Supplement: Figure 2—source data 1. [file elife-50561-fig2-data1.xlsx]

## Sheet: Sheet1
FIGURE 2C
qRT PCR
		has-miR-934 RELATIVE EXPRESSION
Experiments (n=3)		HUES6	HUES6-derived NPCs	Neurons
1		undetectable	3.07518	undetectable
2		undetectable	2.5	undetectable
3		undetectable	2.4	undetectable
Average			2.65839
St Error		0	0.210384	0
