# Supplementary material for: MicroRNA-934 is a novel primate-specific small non-coding RNA with neurogenic function during early development
Source: eLife. 2020 May 27;9:e50561. doi: 10.7554/eLife.50561 (PMC7295570; doi:10.7554/eLife.50561)
Supplement: Figure 3—source data 1. [file elife-50561-fig3-data1.xlsx]

## Sheet: % Relative data
FIGURE 3O
		% Relative PAX6+ cells
	Experiments (n=3)	CT MIMICS	MIR934 MIMICS
	1	100	49.6929
	2	138.03	74.8651
	3	108.818	85.6952
	Average	115.616	70.0844
	St Err	11.4923	10.6643
	Averages Normalized to 100	100	60.6183
	St err (scaled to normalized Average values)	9.94003	9.22392
	p value		0.0442302
FIGURE 3P
		% Relative DCX+ cells
	Experiments (n=3)	CT MIMICS	MIR934 MIMICS
	1	122.691	166.046
	2	100	156.932
	3	106.952	144.745
	Average	109.881	155.908
	St Err	6.7121	6.17032
	Averages Normalized to 100	100	141.888
	St err (scaled to normalized Average values)	6.10852	5.61546
	p value		0.00737564
FIGURE 3Q
		% Relative PAX6+ cells
	Experiment	CT INHIBITORS	MIR934 INHIBITORS
	1	156.688	173.264
	2	140.689	187.721
	3	126.606	172.003
	4	100	236.569
	5	143.825	164.967
	Average	134	187
	St Err	9.65851	12.9549
	Averages Normalized to 100	100	139.552
	St err (scaled to normalized Average values)	7.20784	9.66781
	p value		0.0121077
FIGURE 3R
		% Relative DCX+ cells
	Experiment	CT INHIBITORS	MIR934 INHIBITORS
	1	105.411	71.3676
	2	150.385	98.8269
	3	100	63.2532
	4	119.008	79.6144
	5	135.765	113.19
	6		102.772
	Average	122.114	88.1706
	St Err	9.38962	8.01902
	Averages Normalized to 100	100	72.2037
	St err (scaled to normalized Average values)	7.68924	6.56685
	p value		0.0240052
