# Supplementary material for: MicroRNA-934 is a novel primate-specific small non-coding RNA with neurogenic function during early development
Source: eLife. 2020 May 27;9:e50561. doi: 10.7554/eLife.50561 (PMC7295570; doi:10.7554/eLife.50561)
Supplement: Figure 3—source data 2. [file elife-50561-fig3-data2.xlsx]

## Sheet: Sheet1
FIGURE 3S
		Longest Process Length (μm)
	Experiment (n=3)	CT INHIBITORS	MIR934 INHIBITORS
	1	83.7258	48855.7
	2	131.022	61.4225
	3	137.654	56.629
	4	86.7585	51.2424
	Average	109.79	54.5374
			p=0.02
FIGURE 3T
		% bipolar TUJ1+ Neurons
	Experiment (n=3)	CT INHIBITORS	MIR934 INHIBITORS
	1	50	34.1463
	2	63.1579	31.4286
	3	59.1837	35.1351
	4	51.2821	36.8421
	Average	55.9059	34.388
			p=0.003
