# Supplementary material for: MicroRNA-934 is a novel primate-specific small non-coding RNA with neurogenic function during early development
Source: eLife. 2020 May 27;9:e50561. doi: 10.7554/eLife.50561 (PMC7295570; doi:10.7554/eLife.50561)
Supplement: Figure 4—source data 1. [file elife-50561-fig4-data1.xlsx]

## Sheet: Sheet1
FIGURE 4B
qRTPCR for miR934 predicted targets
	TFCP2L1 Relative Expression
Experiments (n=4)	Scrambled	MiR934 Inhibition
1	1.00203	4.45861
2	1.02729	2.94609
3	0.99992	2.0856
4	1.00162	5.02605
Average	1.00771	3.62909
	STMN2 Relative Expression
Experiments (n=4)	Scrambled	MiR934 Inhibition
1	1.00276	2.10418
2	0.999916	1.83358
3	1.01495	2.50328
4	1.00541	1.37596
Average	1.00576	1.95425
	RAB3B Relative Expression
Experiments (n=4)	Scrambled	MiR934 Inhibition
1	1.00057	2.65287
2	1.00187	2.83048
3	1.01547	1.56981
4	1.00008	2.14127
Average	1.0045	2.29861
	FZD5 Relative Expression
Experiments (n=4)	Scrambled	MiR934 Inhibition
1	1.00855	1.30172
2	1	1.45481
3	1.00231	1.41932
4	1.00519	1.60096
Average	1.00401	1.4442
	F11R Relative Expression
Experiments (n=4)	Scrambled	MiR934 Inhibition
1	1.00125	0.884245
2	1.00091	1.3115
3	1.00113	0.606545
4	1.00104	0.685519
Average	1.00108	0.871952
	SLC16A1 Relative Expression
Experiments (n=4)	Scrambled	MiR934 Inhibition
1	1.0042	0.721832
2	1.00447	1.13419
3	1.00231	0.744005
4	1.00058	0.732693
Average	1.00289	0.833181
