# Supplementary material for: MicroRNA-934 is a novel primate-specific small non-coding RNA with neurogenic function during early development
Source: eLife. 2020 May 27;9:e50561. doi: 10.7554/eLife.50561 (PMC7295570; doi:10.7554/eLife.50561)
Supplement: Figure 4—source data 2. [file elife-50561-fig4-data2.xlsx]

## Sheet: Sheet1
FIGURE 4D
luciferase activity in HEK293T cells upon co-transfection with miR-934 mimics and the MRE (8-mer binding site) reporter construct
		mutated 3'UTR 8mer				3 'UTR 8mer
Experiment (n=3)		Control Mimics		miR934 Mimics		Control Mimics		miR934 Mimics
1		100		97.4601		100		65.598
2		100		93.3048		100		60.0516
3		100		93.8824		100		65.3949
Average		100		94.8824		100		63.6815
St Err		0		2.57763		0		1.81588
P value				0.297039				0.00249053
