# Supplementary material for: MicroRNA-934 is a novel primate-specific small non-coding RNA with neurogenic function during early development
Source: eLife. 2020 May 27;9:e50561. doi: 10.7554/eLife.50561 (PMC7295570; doi:10.7554/eLife.50561)
Supplement: Figure 4—source data 3. [file elife-50561-fig4-data3.xlsx]

## Sheet: Sheet1
FIGURE 4F
Western Blot for FZD5 protein following miR934 Sustained inhibition
Experiment (n=3)	Scrambled	MiR934 Inhibition
1	100	127
2	100	126
3	100	121
4	100	142
Average	100	129
St Err		4.5
p value		0.00757139
FIGURE 4F
Western Blot for β-catenin following miR934 Sustained inhibition
Experiment (n=3)	Scrambled	MiR934 Inhibition
1	100	125
2	100	132
3	100	116
4	100	141
Average	100	128.5
St Err		5.2
p value		0.0121279
