# Supplementary material for: MicroRNA-934 is a novel primate-specific small non-coding RNA with neurogenic function during early development
Source: eLife. 2020 May 27;9:e50561. doi: 10.7554/eLife.50561 (PMC7295570; doi:10.7554/eLife.50561)
Supplement: Figure 5—source data 1. [file elife-50561-fig5-data1.xlsx]

## Sheet: Sheet1
FIGURE 5G
qRT PCR for genes affected by miR-934 inhibition
	LEF1 Relative Expression
Experiments	Scrambled Control	miR-934 Inhibition
1	1.00137	1.29053
2	1.00006	1.62405
3	1.00009	1.73838
4	1.00026	1.6547
AV	1.00045	1.57691
ST err	0.000311316	0.0984717
TTEST	0.00993621
	TFAP2C Relative Expression
Experiments (n=4)	Scrambled Control	miR-934 Inhibition
1	1.00046	0.644387
2	1	0.615146
3	0.999654	0.896577
4	1.00035	0.862742
AV	1.00012	0.754713
ST err	0.000182926	0.0727132
TTEST	0.0432518
	MOXD1 Relative Expression
Experiments (n=4)	Scrambled Control	miR-934 Inhibition
1	1.00142	0.540737
2	1	0.316001
3	1.00074	0.808713
4	1.00035	0.772264
AV	1.00063	0.609429
ST err	0.000305477	0.1144
TTEST	0.0418555
	ID2 Relative Expression
Experiments (n=4)	Scrambled Control	miR-934 Inhibition
1	1.05395	1.22359
2	1.01315	1.70035
3	1.00753	1.83451
4	1.0027	1.34885
AV	1.01933	1.52683
ST err	0.0117357	0.143877
TTEST	0.038232
	NCAD Relative Expression
Experiments (n=4)	Scrambled Control	miR-934 Inhibition
1	1.01017	1.84872
2	1.00001	2.03959
3	1.00043	1.37129
4	1.00073	2.13433
AV	1.00354	1.7532
ST err	0.00244872	0.16979
TTEST	0.0155468
	GATA2 Relative Expression
Experiments (n=4)	Scrambled Control	miR-934 Inhibition
1	1.04505	0.6259
2	1.00139	0.843424
3	1.00076	0.85402
4	1.0055	0.69701
AV	1.01317	0.755088
ST err	0.0106764	0.0560159
TTEST	0.0173341
	SYNGAP1 Relative Expression
Experiments (n=4)	Scrambled Control	miR-934 Inhibition
1	1.00003	3.26162
2	1.00198	2.21858
3	1.00067	1.66044
4	1.00078	2.51092
AV	1.00087	2.41289
ST err	0.000407504	0.333402
TTEST	0.024093
	PRSS12 Relative Expression
Experiments (n=4)	Scrambled Control	miR-934 Inhibition
1	1.01641	0.649484
2	1.00303	0.688274
3	1.00035	0.610686
4	1.00035	0.767373
AV	1.00503	0.678954
ST err	0.0038447	0.0334588
TTEST	0.00209731
	TPD52L1 Relative Expression
Experiments (n=3)	Scrambled Control	miR-934 Inhibition
1	1.00095	0.644108
2	1.00011	0.535721
3	1.00391	0.776663
AV	1.00165	0.652164
ST err	0.00115242	0.0696704
TTEST	0.0374854
