# Supplementary material for: MicroRNA-934 is a novel primate-specific small non-coding RNA with neurogenic function during early development
Source: eLife. 2020 May 27;9:e50561. doi: 10.7554/eLife.50561 (PMC7295570; doi:10.7554/eLife.50561)
Supplement: Figure 6—source data 1. [file elife-50561-fig6-data1.xlsx]

## Sheet: Sheet1
FIGURE 6C
qRT-PCR showing downregulation of mir34c-5p following miR-934 sustained inhibition
	hsa-miR-34c-5p Relative Expression
Experiments	Scrambled Control	miR-934 Inhibition
1	1.00017	0.585673
2	1.00412	0.463961
3	1.01727	0.499697
Average	1.00719	0.516444
St Error	0.00516875	0.0361192
P value	0.00467666
