# Supplementary material for: MicroRNA-934 is a novel primate-specific small non-coding RNA with neurogenic function during early development
Source: eLife. 2020 May 27;9:e50561. doi: 10.7554/eLife.50561 (PMC7295570; doi:10.7554/eLife.50561)
Supplement: Supplementary file 6. [file elife-50561-supp6.docx]

**Supplemental Table 6.** 3’ UTR binding sites for miR934 on its predicted targets (adapted from Diana microT-CDS)

| **Target** | **Binding Type** | **Score** | **Position on chromosome** | **Conserved Species** | **Binding Area** |
| --- | --- | --- | --- | --- | --- |
| **STMN2** | 8mer | 0.039 | 8:80577484-80577512 | panTro2,rheMac2  rn4,mm9,oryCun2  bosTau4,canFam2  dasNov2,loxAfr3 | | (Transcript) | 5' | ______AAAGAAAAAUGAG__C________ | 3' |  |  |  |  | | --- | --- | --- | --- | --- | --- | --- | --- | |  |  | _UUCCA_____________GU_AGUAGACA |  |  |  |  |  | |  |  | _.||||_____________||_|||||||| |  |  |  |  |  | |  |  | _GAGGU_____________CA_UCAUCUGU |  |  |  |  |  | | (miRNA) | 3' | A_____________________________ | 5' |  |  |  |  | |
| **TFCP2L1** | 7mer | 0.01 | 2:121981854-121981879 | panTro2  monDom5 | | (Transcript) | 5' | AGC__U___GA___CC___GAU_______ | 3' | | --- | --- | --- | --- | |  |  | ___CC_GUG__UCC__GUG___GUAGACA |  | |  |  | ___||_|||__|||__||.___||||||| |  | |  |  | ___GG_CAC__AGG__CAU___CAUCUGU |  | | (miRNA) | 3' | _____U___AG___U______________ | 5' | |
|  | 9mer | 0.02 | 2:121975850-121975867 | panTro2,rheMac2 | | (Transcript) | 5' | AAAAAAAAAAU____AUUUU_________ | 3' | | --- | --- | --- | --- | |  |  | ___________UCUU_____UAGUAGACA |  | |  |  | ___________|||._____||||||||| |  | |  |  | ___________AGAG_____AUCAUCUGU |  | | (miRNA) | 3' | __________C____GUC___________ | 5' | |
| **RAB3B** | 7mer | 0.006 | 1:52376808-52376829 | panTro2 | | (Transcript) | 5' | UGGCUUC_______A_____CA________ | 3' | | --- | --- | --- | --- | |  |  | _______CCAG_GU_UCCAG__GGUAGACA |  | |  |  | _______||||_||_|||||__.||||||| |  | |  |  | _______GGUC_CA_AGGUC__UCAUCUGU |  | | (miRNA) | 3' | ___________A__G_____A_________ | 5' | |
|  | 7mer | 0.002 | 1:52375870-52375892 | Not Conserved | | (Transcript) | 5' | AGUAAA_________U___ACCCCU_______ | 3' | | --- | --- | --- | --- | |  |  | ______CUA___UCU_CCA______GUAGACA |  | |  |  | ______|.|___|||_|||______||||||| |  | |  |  | ______GGU___AGA_GGU______CAUCUGU |  | | (miRNA) | 3' | _________CAC_______CAU__________ | 5' | |
|  | 8mer | 0.01 | 1:52380265-52380293 | panTro2 | | (Transcript) | 5' | _______CUGA____UUAUAU_A________ | 3' | | --- | --- | --- | --- | |  |  | _AG_GUC____UCCA______G_AGUAGACA |  | |  |  | _||_|||____||||______|_|||||||| |  | |  |  | _UC_CAG____AGGU______C_UCAUCUGU |  | | (miRNA) | 3' | G__A__________________A________ | 5' | |
|  | 8mer | 0.01 | 1:52380265-52380293 | panTro2 | | (Transcript) | 5' | _______CUGA____UUAUAU_A________ | 3' | | --- | --- | --- | --- | |  |  | _AG_GUC____UCCA______G_AGUAGACA |  | |  |  | _||_|||____||||______|_|||||||| |  | |  |  | _UC_CAG____AGGU______C_UCAUCUGU |  | | (miRNA) | 3' | G__A__________________A________ | 5' | |
| **FZD5** | 7mer | 0.03 | 2:208627688-208627711 | panTro2,rheMac2rn4,mm9,oryCun2bosTau4,canFam2loxAfr3 | | (Transcript) | 5' | UAGAG____C_AUA_____UUU_______ | 3' | | --- | --- | --- | --- | |  |  | _____CCAG_G___CUUUA___GUAGACA |  | |  |  | _____||||_|___||..|___||||||| |  | |  |  | _____GGUC_C___GAGGU___CAUCUGU |  | | (miRNA) | 3' | _________A_A_______CAU_______ | 5' | |
|  | 8mer | 0.005 | 2:208629524-208629544 | panTro2 | | (Transcript) | 5' | AUUUCAUA_____UC____AA________ | 3' | | --- | --- | --- | --- | |  |  | ________UGUCU__CCAG__AGUAGACA |  | |  |  | ________|||||__||||__|||||||| |  | |  |  | ________ACAGA__GGUC__UCAUCUGU |  | | (miRNA) | 3' | _______C___________A_________ | 5 | |
